# Supplementary material for: Identification and functional analysis of lncRNAs and mRNAs between tumorigenesis and metastasis in CRC
Source: publisher site journal article supplement (doi:10.18632/aging.203775), 2021-12-26
Supplement: Supplementary file [file aging-v13i24-203775-supplementary-material-SD2.pdf]

## SUPPLEMENTARY TABLES

**Supplementary Table 1. Top 10 up and top 10 down differentially expressed lncRNAs in PT vs NM.**

| lncRNAs         | Fold-change (PT/NM) | Style | P-value   | FDR       |
|-----------------|---------------------|-------|-----------|-----------|
| ENST00000550851 | 12.04               | up    | 0.000151  | 0.0031    |
| ENST00000554679 | 10.98               | up    | 0.0000988 | 0.00263   |
| ENST00000544679 | 8.44                | up    | 0.0008706 | 0.00931   |
| ENST00000497498 | 8.29                | up    | 0.0000172 | 0.00105   |
| n345207         | 6.72                | up    | 0.0000078 | 0.000656  |
| ENST00000546740 | 6.16                | up    | 0.0000045 | 0.000525  |
| ENST00000540885 | 5.58                | up    | 0.0001438 | 0.00308   |
| ENST00000497139 | 5.44                | up    | 0.0000634 | 0.00209   |
| ENST00000579474 | 5.22                | up    | 0.0000304 | 0.00142   |
| n378874         | 5.19                | up    | 0.0000864 | 0.00253   |
| n382289         | 27.78               | down  | 0.0000002 | 0.0000984 |
| ENST00000424969 | 21.28               | down  | 0.0000018 | 0.000354  |
| n334169         | 15.63               | down  | 0.0000002 | 0.0000984 |
| ENST00000390319 | 12.20               | down  | 0.0000006 | 0.000197  |
| n335875         | 10.99               | down  | 0.0000028 | 0.000459  |
| ENST00000390309 | 10.00               | down  | 0.0000072 | 0.000656  |
| n383670         | 10.00               | down  | 0.000027  | 0.00133   |
| n336760         | 9.09                | down  | 0.0000182 | 0.00105   |
| n335821         | 9.09                | down  | 0.0000381 | 0.00163   |
| ENST00000572964 | 9.09                | down  | 0.0004371 | 0.00582   |

**Supplementary Table 2. Top 10 up and top 10 down differentially expressed lncRNAs in MLN vs NM.**

| lncRNAs         | Fold-change (MLN/NM) | Style | P-value   | FDR      |
|-----------------|----------------------|-------|-----------|----------|
| ENST00000554679 | 12.02                | up    | 0.0000016 | 0.000796 |
| ENST00000497498 | 10.30                | up    | 0.0000028 | 0.000796 |
| ENST00000466541 | 7.03                 | up    | 0.0000077 | 0.00103  |
| ENST00000550851 | 7.01                 | up    | 0.0013179 | 0.0137   |
| ENST00000544679 | 6.35                 | up    | 0.0003233 | 0.00831  |
| ENST00000504484 | 5.91                 | up    | 0.0000048 | 0.000796 |
| ENST00000579474 | 5.62                 | up    | 0.0000041 | 0.000796 |
| n332986         | 5.15                 | up    | 0.0001443 | 0.00737  |
| ENST00000526907 | 4.99                 | up    | 0.0002169 | 0.00808  |
| ENST00000481038 | 4.45                 | up    | 0.0113058 | 0.0441   |
| n382289         | 11.90                | down  | 0.0000025 | 0.000796 |
| ENST00000424969 | 11.49                | down  | 0.000063  | 0.00465  |
| ENST00000560210 | 10.75                | down  | 0.0000052 | 0.000796 |
| ENST00000572964 | 10.00                | down  | 0.0002002 | 0.00808  |
| n405560         | 7.69                 | down  | 0.0000187 | 0.002    |
| n368675         | 5.56                 | down  | 0.005328  | 0.029    |
| n387234         | 5.26                 | down  | 0.0014105 | 0.0143   |
| ENST00000491695 | 4.76                 | down  | 0.0000519 | 0.00428  |
| ENST00000491695 | 4.76                 | down  | 0.0007611 | 0.011    |
| ENST00000486141 | 4.55                 | down  | 0.0243679 | 0.071    |

**Supplementary Table 3. Top 20 core lncRNAs with high degree in PT.**

| <b>lncRNA</b>   | <b>Clustering coefficient</b> | <b>Dgree</b> | <b>Style</b> |
|-----------------|-------------------------------|--------------|--------------|
| ENST00000522190 | 0.66007905                    | 23           | up           |
| ENST00000478958 | 0.62770563                    | 22           | up           |
| ENST00000505982 | 0.68571429                    | 21           | up           |
| n378919         | 0.64761905                    | 21           | up           |
| ENST00000439231 | 0.63809524                    | 21           | up           |
| n345275         | 0.82631579                    | 20           | down         |
| n365932         | 0.82631579                    | 20           | up           |
| ENST00000465881 | 0.82631579                    | 20           | up           |
| ENST00000490162 | 0.82631579                    | 20           | up           |
| ENST00000511430 | 0.82631579                    | 20           | down         |
| ENST00000390593 | 0.82631579                    | 20           | down         |
| ENST00000579474 | 0.7                           | 20           | up           |
| n342918         | 0.85380117                    | 19           | down         |
| ENST00000495707 | 0.67836257                    | 19           | up           |
| ENST00000482470 | 0.66666667                    | 19           | up           |
| n373767         | 0.82352941                    | 18           | down         |
| n335875         | 0.82352941                    | 18           | down         |
| n386586         | 0.82352941                    | 18           | up           |
| ENST00000472617 | 0.81045752                    | 18           | down         |
| n345687         | 0.77124183                    | 18           | up           |

**Supplementary Table 4. Top 20 core mRNAs with high degree in PT.**

| <b>Gene symbol</b> | <b>Clustering coefficient</b> | <b>Dgree</b> | <b>Style</b> |
|--------------------|-------------------------------|--------------|--------------|
| GGTA1P             | 0.82631579                    | 20           | down         |
| KIAA0101           | 0.66666667                    | 19           | up           |
| KLF4               | 0.8496732                     | 18           | down         |
| SLFN13             | 0.82352941                    | 18           | down         |
| ITM2A              | 0.76470588                    | 18           | down         |
| TPH1               | 0.91911765                    | 17           | down         |
| HEPACAM2           | 0.90441176                    | 17           | down         |
| ZG16               | 0.875                         | 17           | down         |
| ANGPT2             | 0.81617647                    | 17           | up           |
| GCG                | 0.81617647                    | 17           | down         |
| SLC6A6             | 0.80882353                    | 17           | up           |
| KAL1               | 0.78676471                    | 17           | up           |
| TLR7               | 0.78676471                    | 17           | down         |
| ITLN1              | 0.77941176                    | 17           | down         |
| DIAPH3             | 0.75735294                    | 17           | up           |
| CKAP2              | 0.75                          | 17           | up           |
| RNASE6             | 0.74264706                    | 17           | down         |
| TOP2A              | 0.67647059                    | 17           | up           |
| GIMAP7             | 0.79166667                    | 16           | down         |
| KIF11              | 0.74166667                    | 16           | up           |

**Supplementary Table 5. Top 20 core lncRNAs with high degree in MLN.**

| <b>lncRNA</b>   | <b>Clustering coefficient</b> | <b>Dgree</b> |
|-----------------|-------------------------------|--------------|
| ENST00000358476 | 0.72105263                    | 20           |
| ENST00000481038 | 0.67894737                    | 20           |
| ENST00000551987 | 0.67894737                    | 20           |
| FR0204559       | 0.67894737                    | 20           |
| ENST00000601390 | 0.78947368                    | 19           |
| ENST00000512810 | 0.81699346                    | 18           |
| ENST00000491824 | 0.79084967                    | 18           |
| ENST00000578243 | 0.71895425                    | 18           |
| ENST00000491331 | 0.66013072                    | 18           |
| ENST00000449838 | 0.77205882                    | 17           |
| ENST00000588806 | 0.75735294                    | 17           |
| ENST00000368256 | 0.72794118                    | 17           |
| ENST00000479928 | 0.66176471                    | 17           |
| ENST00000495178 | 0.52941176                    | 17           |
| ENST00000435872 | 0.825                         | 16           |
| ENST00000480320 | 0.825                         | 16           |
| ENST00000510037 | 0.825                         | 16           |
| n344604         | 0.825                         | 16           |
| n373212         | 0.825                         | 16           |
| ENST00000478698 | 0.80833333                    | 16           |

**Supplementary Table 6. Top 20 core mRNAs with high degree in MLN.**

| <b>Gene symbol</b> | <b>Clustering coefficient</b> | <b>Dgree</b> |
|--------------------|-------------------------------|--------------|
| ARHGAP15           | 0.7047619                     | 21           |
| CXCL13             | 0.7                           | 21           |
| ITK                | 0.72105263                    | 20           |
| GOLM1              | 0.66315789                    | 20           |
| CD3G               | 0.78947368                    | 19           |
| FGL2               | 0.78947368                    | 19           |
| FAIM3              | 0.73684211                    | 19           |
| CASP5              | 0.71345029                    | 19           |
| CYP1B1             | 0.71345029                    | 19           |
| NXPE1              | 0.67836257                    | 19           |
| GNG2               | 0.82352941                    | 18           |
| HELLS              | 0.81045752                    | 18           |
| GTSF1              | 0.79084967                    | 18           |
| CA1                | 0.73856209                    | 18           |
| CCDC144A           | 0.62091503                    | 18           |
| SLAIN1             | 0.80882353                    | 17           |
| HLA-DPA1           | 0.77205882                    | 17           |
| LIFR               | 0.60294118                    | 17           |
| AKT3               | 0.8                           | 16           |
| NAT2               | 0.8                           | 16           |

**Supplementary Table 7. Sequences of the primers used in quantitative RT-PCR.**

| <b>Transcripts</b> | <b>Sequence</b>                                               |
|--------------------|---------------------------------------------------------------|
| FN1-227            | F:5'-CCCTGCCAGCTTAAGAACAG-3'<br>R:5'-CCACTTTGCCACTCTCTTCC-3'  |
| lnc-CDR1-1:2       | F:5'-CCGGATAATTTGGGTCTTCC -3'<br>R:5'-GGAGGCCATTGGAAGATGT-3'  |
| lnc-RCHY1-4:1      | F:5'-ATTTCAACCTGGGCAACAAG-3'<br>R:5'-CGGAAGTCTTCAGGGAATCA-3'  |
| SHROOM3-203        | F:5'-CAGTTTCCCTGGTCAAAGGA-3'<br>R:5'-TGTCCATCCATGTCTCTGGA-3'  |
| lnc-RTN4-2:2       | F:5'-GAAAGCACACTTGGCATGAA-3'<br>R:5'-ATGTTTTTCAGAGCGGGTCAC-3' |
| CBX3-208           | F:5'-CTGAGCAGAAACCAAGTTG-3'<br>R:5'-ACCCAAACAACCTCACAACG-3'   |
| VCAN-209           | F:5'-TTGAGAAGATGTTGATGAC-3'<br>R:5'-TTATAGCCCTTTTACATTG-3'    |
| LGR5-206           | F:5'-ACCGTCTGCAATCAGTTAC-3'<br>R:5'-ATGGAAGTTGCCTGTTTAC-3'    |
| lnc-ZFYVE26-1:1    | F:5'-CTCATGGAAACAAGCACTG-3'<br>R:5'-TGCCAGATACCTGTCATTG-3'    |
| Lnc-MIR29B2CHG93   | F:5'-ACCAGCATGAATGTGTTTCG-3'<br>R:5'-ATCGACACCCAATACATTG-3'   |
| GAPDH              | F:5'-GATTCCACCCATGGCAAATTC-3'<br>R:5'-AGCATCGCCCCACTTGATT-3'  |
